# Supplementary material for: Modeling the Effect of APC Truncation on Destruction Complex Function in Colorectal Cancer Cells
Source: PubMed Central journal article supplement (PMC3784502; doi:10.1371/journal.pcbi.1003217), 2013-09-26
Supplement: pcbi.1003217.s003.pdf [file pcbi.1003217.s003.pdf]

**Table S1:** Local parameter sensitivity analysis.

| Parameter         | Sensitivity coefficient <sup>1</sup> | Comment                                                                                                      |
|-------------------|--------------------------------------|--------------------------------------------------------------------------------------------------------------|
| $k_{s,b}$         | 1.02                                 | $\beta$ -catenin synthesis rate constant                                                                     |
| $AXIN_{tot}$      | $-9.74 \times 10^{-01}$              | Axin concentration                                                                                           |
| $k_{p,b}$         | $-9.22 \times 10^{-01}$              | $\beta$ -catenin phosphorylation rate constant                                                               |
| $k_{f,apa}$       | $-5.07 \times 10^{-01}$              | Axin binding to the APC SAMP repeats (forward rate constant)                                                 |
| $APC_{tot}$       | $4.84 \times 10^{-01}$               | APC concentration                                                                                            |
| $k_{r,apa}$       | $4.60 \times 10^{-01}$               | Axin binding to the APC SAMP repeats (dissociation rate constant)                                            |
| $k_{-p,b}$        | $3.45 \times 10^{-01}$               | $\beta$ -catenin dephosphorylation rate constant                                                             |
| $CK1\alpha_{tot}$ | $-3.00 \times 10^{-01}$              | CK1 $\alpha$ concentration                                                                                   |
| $k_{f,ca}$        | $-2.85 \times 10^{-01}$              | CK1 $\alpha$ binding to Axin (forward rate constant)                                                         |
| $k_{r,ca}$        | $2.59 \times 10^{-01}$               | CK1 $\alpha$ binding to Axin (dissociation rate constant)                                                    |
| $GSK_{tot}$       | $-2.32 \times 10^{-01}$              | GSK-3 $\beta$ concentration                                                                                  |
| $k_{d,b2}$        | $-2.24 \times 10^{-01}$              | $\beta$ -catenin degradation (fast degradation rate constant)                                                |
| $k_{f,ga}$        | $-2.19 \times 10^{-01}$              | GSK-3 $\beta$ binding to Axin (forward rate constant)                                                        |
| $k_{r,ga}$        | $2.04 \times 10^{-01}$               | GSK-3 $\beta$ binding to Axin (dissociation rate constant)                                                   |
| $k_{d,b1}$        | $-6.56 \times 10^{-02}$              | $\beta$ -catenin degradation (slow degradation rate constant)                                                |
| $k_{f,ba}$        | $-3.55 \times 10^{-02}$              | $\beta$ -catenin ARM repeats 3 and 4 binding to Axin (forward rate constant)                                 |
| $k_{r,ba}$        | $2.85 \times 10^{-02}$               | $\beta$ -catenin ARM repeats 3 and 4 binding to Axin (dissociation rate constant)                            |
| $k_p$             | $2.54 \times 10^{-02}$               | APC phosphorylation rate constant                                                                            |
| $k_{-p}$          | $-2.50 \times 10^{-02}$              | APC dephosphorylation rate constant                                                                          |
| $k_{f2,bap}$      | $2.15 \times 10^{-02}$               | $\beta$ -catenin ARM repeats 3 and 4 binding to phosphorylated APC 20-aa repeat (forward rate constant)      |
| $k_{r1,bap}$      | $1.06 \times 10^{-02}$               | $\beta$ -catenin ARM repeats 5-9 binding to APC 15-aa repeat region (dissociation rate constant)             |
| $k_{r2,bap}$      | $-1.03 \times 10^{-02}$              | $\beta$ -catenin ARM repeats 3 and 4 binding to phosphorylated APC 20-aa repeat (dissociation rate constant) |
| $\chi$            | $-1.01 \times 10^{-02}$              | Enhancement factor for intracomplex binding                                                                  |
| $k_{f1,bap}$      | $-7.53 \times 10^{-03}$              | $\beta$ -catenin ARM repeats 5-9 binding to APC 15-aa repeat region (forward rate constant)                  |
| $BCAT_{tot}$      | N/A                                  | $\beta$ -catenin concentration                                                                               |

<sup>1</sup>In general local (differential) sensitivity coefficients are defined as  $\frac{x_i}{y_j} \left( \frac{\partial y_j}{\partial x_i} \right)$ , where  $x_i$  represents the

value of a model parameter and  $y_j$  represents the steady-state value of a model variable. Here, we focus on sensitivity coefficients for the steady-state level of  $\beta$ -catenin. The partial derivative appearing in the definition of each sensitivity coefficient is calculated via a finite-difference approximation:  $\frac{\partial y_j}{\partial x_i} \sim \frac{\Delta y_j}{\Delta x_i}$ ,

where  $\Delta x_i$  represents a 1% change in the nominal value of parameter  $x_i$  (Table 1) and  $\Delta y_j$  represents the resulting change in the steady-state value of the variable  $y_j$  (i.e., the steady-state concentration of  $\beta$ -catenin). A positive (negative) sensitivity coefficient indicates that an increase in the value of the corresponding parameter value causes an increase (decrease) in the steady-state value of the corresponding variable ( $y_j$ , the steady-state concentration of  $\beta$ -catenin). The sensitivity coefficients given here characterize the robustness of the nominal steady state for a normal cell (i.e., the form of the model used to consider the case of full-length APC).
